# Supplementary material for: Identification and Validation of Reliable Reference Genes for Gene Expression Studies in Koelreuteria paniculata
Source: MDPI journal article supplement (doi:10.3390/genes13050714), 2022-04-19
Supplement: s1 [file s1]

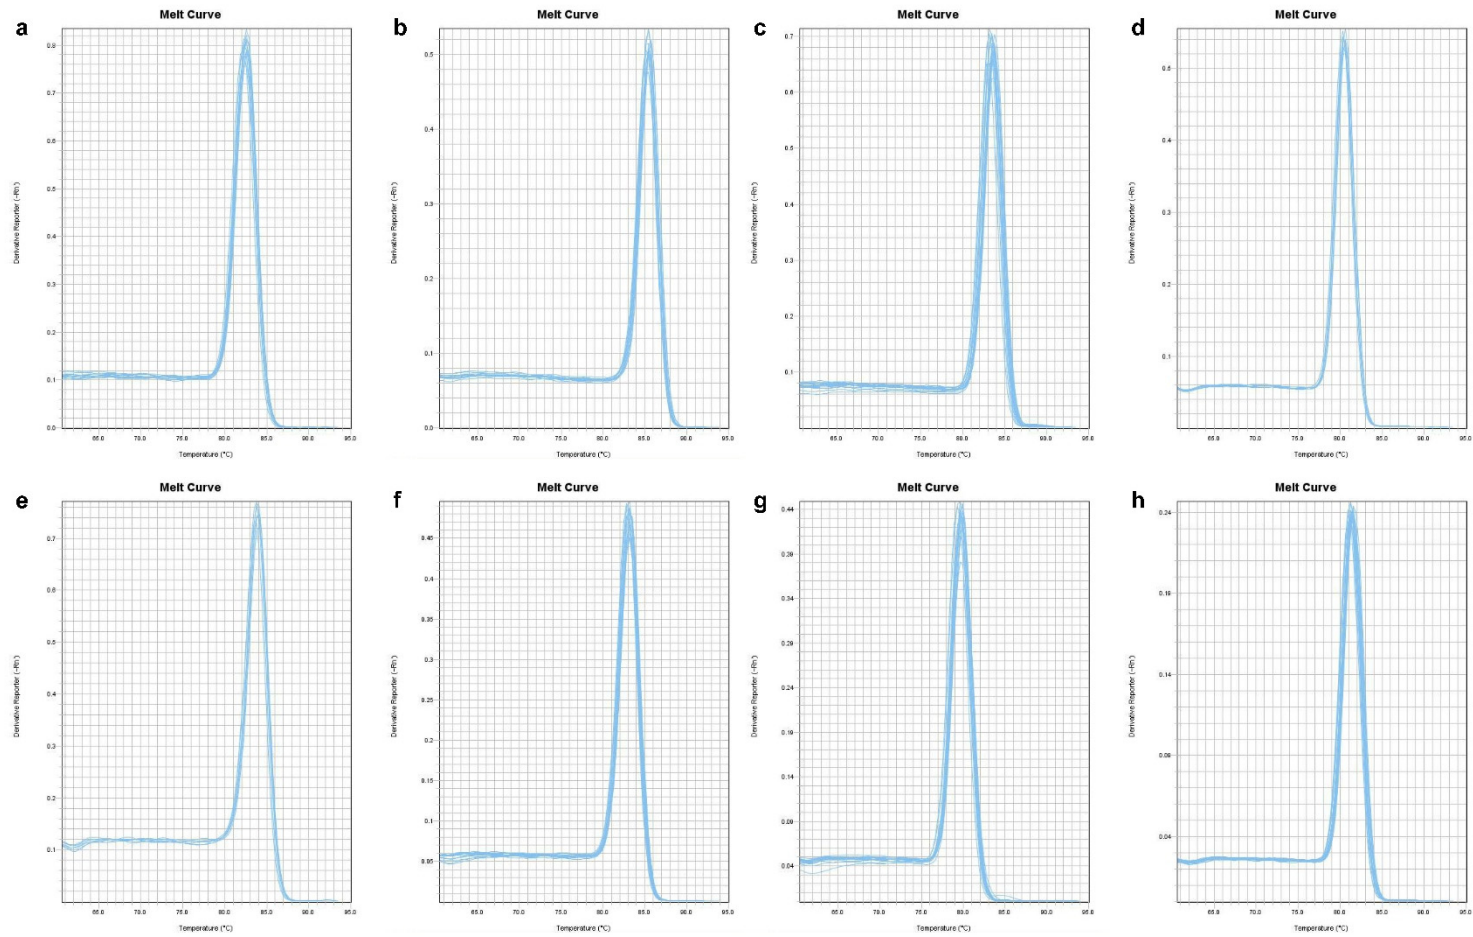

Supplement Figure S1 Melt curves of the eight candidate reference genes

Note: X-axis: Temperature (°C); Y-axis: Derivative Reporter (-Rn'); a: ACT; b: EF1 $\alpha$ ; c: GAPDH; d: UBQ; e: CYP2; f: RPL13; g: PLA2; h: RP II.

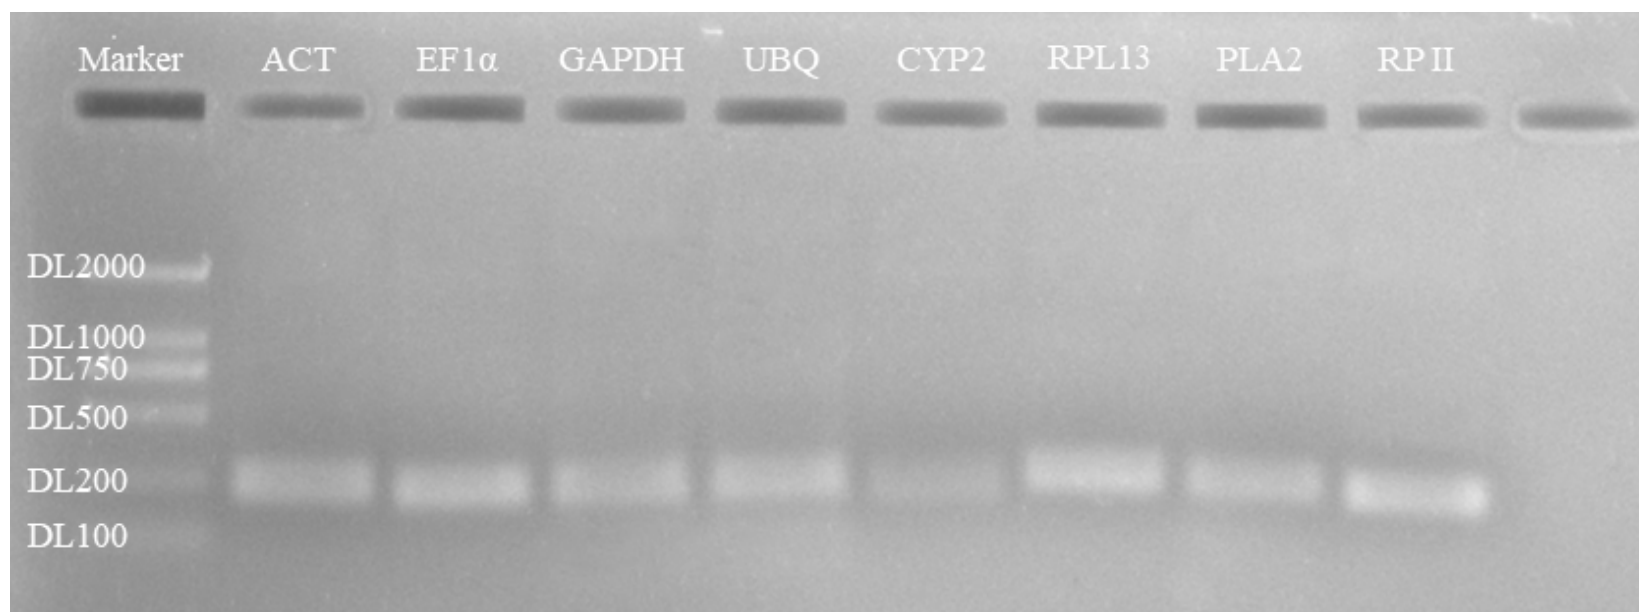

Supplement Figure S2 Electrophoresis gel of the eight candidate reference genes

Supplemental Table S1:

qRT-PCR primers are capitalized and underlined.

*KpCHLG*

ATGTCGTCGGCTGCGCTGAACACAGTTTTGTCCACTAGAATATCCAACGTCGTCAACGCCAACAACCGCCGAGGCCGAGTTGGAGTTCGAACTCACCC  
CGTACTTAACCCGGCTTCCGTTTCCTTACCGCGCGGAGATTGACTGTGAGAGCTCAGGAGACCGATGCAAAAGAAGCTAAATCTCAGGCGCCTGACA  
AAGCGCCGGCTGCAAATGGGTTCGAGTTTCAATCAGCTTCTAGGCATCAAAGGAGCTGCACAAGAACTAATAAATGGAAGATTCGTCTTCAACTAACG  
AAGCCTGTTACTTGGCCTCCATTGGTTTGGGGAGTAGTTTGTGGAGCCGCTGCTTCTGGAACTTTCACTGGAATTTGGAAGATGTTGCCAAATCAAT  
TGTTTGCATGATGATGTCTGGCCCCTGTCTCACTGGTTATACACAGACCATGAATGATTGGTACGATCGAGAGATTGATGCTATTAATGAACCTTACCG  
TCCCATTCTTCAGGAGCAATATCTGAGAATGAGGTCATCACCCAAATCTGGGTTCTGCTTCTAGCAGGCCTTGGGTTAGCTGGTATATTAGATGTTTGG  
GCCGGGCATAACTTTCTATAGTGTTTTACCTAGCTCTGGGTGGATCCTTGCTTTCGTATATCTACTCTGCTCCACCTTTAAAGCTCAAACAAAATGGATG  
GATCGGAAATTTCTGCTCTGGGAGCAAGCTATATCAGTTTGCCATGGTGGGCTGGCCAAGCTTTGTTTGAACGCTTACACCTGACATAATAGTTCTCAC  
GCTCTTGACAGCATAGCAGGGTTAGGTATTGCCATCGTGAATGACTTTAAGAGTATCGAAGGAGATAGAGCACTGGGACTGCAGTCTCTTCCAGTTGC  
TTTTGGTGCTGAAGCTGCTAAATGGATTTGTGTTGGCGCCATCGACGTAACCTCAATTGTCAGTGGCTGGTTACCTACTTGGGGCTGGTAAACCATTATAT  
GCCCTAGCTCTGCTTGGCTTGATTATTCCCAAGTTGTCTTCCAGTTTAAATACTTCCTCAAAGACCCTGTAAAATATGATGTAAAATATCAGGCTAGTGC  
CCAGCCATTCTTGTGCTCGGTCTACTTGTGACTGCTTTGGCAACAAGCCATTGALEFT

*KpAPRR*

ATGGGAGAGTTGGTGTTGAGTAGTGAAGAAATGGAAGTTGTGAAGAACACGACAACAACAACAGCAGCAGCAGCAGCAGAAGCAGAGGAAAAGAA  
AGACGGGTTGGTGAAATGGGAGAGGTTCTTGCCAAGGATGACTTTGAGGGTTTTGCTTGTTGAGGCTGATGATTCTACCAGACAAATTATATCTGCCCT  
TTTAAGGAAGTCCAGCTACAGTGTTAATGCCGTTCTGATGGCTTGAAGGCTTGGGAGATTCTGAAGGGAAGACCAGAAAACATAGATATCATATTGAC  
AGAAGTTGATTTACCTTCGATATCTGGATTCGCGCTTCTTACGCTGATTATGGAGCATGAGATTTGCAAAAACATCCCTGTTATAATGATGTCCTCACAGG  
ATTCGGTTAGCACTGTATATAAATGCATGTTGAGAGGTGCTGCTGATTATCTTGTTAAGCCTGTAAAGGAGGAACGAGTTGAGAAATCTGTGGCAGCATG  
TATGGAGAAGACAATCTACAACCATGGGTGGAAATGTTGCCCAAGATGAGAGTGTTGGACAGAAGAGGATTGACGCCTCTTCTGAAAATGCTGCTGCA  
AGTAATCATTCTAGTGGTTACATGGCTTGTATCCAGAGAGATGAAGAGTGCAACGAGAAAGGGAGTGATGCTCAGAGCTCTTGTACAAAACCGGACTT

CGAAGCTGAGAGTACACATGTGGAAGTTACGCAGGATATGTCAACACAGTTAGGGACTAAATGCTTACCGGATGATGTAAAGATGCAGAAGCATAAAG  
GATGTGTTAATTACGTCCAGAAATCACCTGTGCATGAGACTGAAGCAGGAGGATCAGGAGTGGCTGTTGGTGAGGATGCTAACCGAGAAAAACAGAA  
TTTGGGCAAGGATGTTGATCCAGATAGTCAAAGGAAGGATCTTATTATCACCAGTGAGGCCAGTAATGCCCATGTCAATTCTTCCAGAGAAGTCATCGA  
CTTCATGGGAGCCTTGAACAATCTCAATACTTCTTCAAACAATTGCACTAGCAAGTTTGATTCTTCTTCACAATTGAACTTTTCCTTGCGAAGATCTCAT  
CCTAGTGGCTTCGAGAATCAAGTTGCTCAAAAGACATTTACCCTCAAGCATTCTAATGCCTCAGCCTTTACACGGTATACCAACAAGCCAGTGCAGTCT  
CTCCATTCATCTTTTGCAAGTGCTTGCAATCAGCAGAAAGAATTTGATCCTGAGAAGAATTTGTCCAATATTGTTACCACTGGTAACTCCGATACTCCT  
GTTGCCATGCTTAAGTACTCAAAGAAGTATCAATTCTCTGGCTACTAGCCAATTTAAACAATCTGAGGTTGAACTTCATGCCCTCGACAAAGAGTACG  
CCCTGTACAAGTTCCAGTTGAAGGTGTGAGGCTGAATAATGCCTGCACCGGCTATGGCTCTGTACTCCCTAATATATTTTGTGCACAATCGGGTCTATC  
ACCGAGTCCAAATCCAAGTCCAGCCAATCAACAGGAACTTACCTTTTCGAGTTAATCAAATGTATCACTCCAATGTAGAAAATGGTAATTGCGGACAGTT  
ATATGATCGACTTGGTGAAAGTGCAATCAATTCCACCAACCAAGCTATTACAGGTTGGATTCTCTGGAGGATCGTGGACAGATTTCTCCCACCACTGA  
TCAGAGTGCAAGTAGCAGTTTTTTGTAATGGTGCTATAAGTCGTCTTAACAGCATGGGTTATGGAAGCACTTGTGGAAGCAACAACAATGTTGATCAAGG  
TGCTGTTGGCAGGACTGCTGCTGAGAGTAAAAATGAAGAAGGTTTCATACCTTCCTGTGGAACTCACATCGATCAATCCAAAGAGAAGCGGCTCTAA  
ATAAGTTCCGCTTGAAGCGGAAGGATAGGTGCTACGAGAAGAAGGTTCCGTACGAGAGTAGAAAAAACTTGCAGAACAGCGCCCCAGAGTGAAA  
GGACAATTTGTTCTCGTCAAGTGCAGACTGA

*KpHEME*

ATGAGCTTCTCTTCTTTGACAAGTGCGTGCAGTTTCTTAGGAAGCTCGTCGGTGCAGTTAGGTTTCCACTGTGATTCTCTAAAGGGGGTTCTGTTTTC  
TTCTTCCAAGAGTCAAAAATCTACTCTAAAAAAAATCACTGTTTCCTGCTGCTCCTCTTCATCTGATCCACTACTGGTTAAGGCTGCAAAGGCTATC  
CTGTAAGTCGGCCACCAGCATGGATGATGCGTCAGGCAGGAAGGTATATGGCTGTTTACCGAAAGCTTGCAGAAAAGTACCCATCCTTCAGGGAGAGG  
TCAGAGACAATGATCTCATTGTGCAAATTTCTTTGCAGCCTTGGAAGCTTTTCGTCCTGATGGAGTTATCATTTTTTCTGACATACTTACACCACTACCC  
GCATTTGGTGTCCCTTTTGACATAG

*KpCLH*

GGAACAAAATATCAGGGGCATGACAATATGTCTTCTACTTCTTCTGCAACTACAAGTGTTTTTGAGACCGGAAAATACACAACCACGCTTCTAAGGGTG  
GAACCATCTGGGACGACGACGACATGCGTCTCAATTGGTTCATCAGTGGATGTTCCACTTCCACCACCAAGCCACTTCTGATTGCCACCCCTAGTGA  
AGCCGGAGAGTTCCCACTTCTGCTTTTCCTCCACGGTTACCTTCTTTATAACTCCTTCTACTCTCAGCTACTCCAACATGTTGCTTCTCATGGTTTCATCG

TCATTTCTCCTCAGTTATATGAGGTGGCTGGAGCAGACTCAACTGGTGAGATTAAATCTGCAGCTGCAACGACAAATTGGTTATCTGAAGGACTCCGT  
GACTTGCTTCCACCAAATGTTACCCAAATCTAAGTAAGTTAGGTCTTGCTGGTCATAGTCGTGGAGGCAAGACTGCCTTTGCACTGGCTCTAACAA  
AAGCAGCCACTACTTTGAAAATTTCAGCCTTAATAGGCATAGACCCGGTTGATGGTATGGATAAAGGGAAACAACTCCACCACCAGTACTGACTTAC  
GTTCCCTCATTCAATTTGATCTTGATATGGCGGTGATGGTGATCGGTTCAGCCTTAGGTGAAGTAAAAAGAAACCCTCTATTCCCTCCTTGTGCTCCAAAGG  
GAGTTAATCATGAAGACTTCTTCAACGAATGTCGAAAACCAGCCTGTCATTTTGTGGCTAAGGACTATGGTCATCTCGATATGTTGAATGATGATACAAA  
AGGGATTAGAGGGAAAACACTATTATTGTCTCTGTAAGAATGGCAAGTCCAGGGAACCCATGAGGAGGTTTGTGGAGGTATTGTTGTTGCTTTTATGAG  
AGCTTATTTGGATGGTGATACAAGTGAATTGATGTCTATAAGATTTGGGCATGAACTGCACCTGTGGAGCTTAAACTGTTGAATTTCTTGAGTGA

*KpHEMB*

ATGATGAGACGGGTGCATCAATTATGTAAACAAGCTGTTTCCCAGGCCCGAGCTGGAGCAGATGTTGTGAGTCCCAGTGATATGATGGATGGTCGTGT  
AGGAGCAATTCGAGCAGCTCTTGATGCAGAAGGCTTTCAGCATGTTTCTATCATGTCTTATACAGCGAAGTATGCAAGTTCATTTTATGGTCCATTTCG  
AGAGGCACTAGATTCCAATCCACGTTTTGGAGACAAAAAACTTATCAGATGAATCCAGCAAATTACAGAGAGGCCCTTGTGAGGCCCGTGAAGAT  
GAATCTGAAGGAGCTGACATCCTTTTGGTGAAACCAGGTCTTCCTTATTTGGATATTATAAGACTACTCAGAGATAAGTCTCCTTTGCCAATTGCAGCAT  
ATCAGGTTTTCGGGTGAATACTCAATGATCAAGGCTGGTGGGGTTCTCAAGATGATTGGACGAAGAGAGGGTTATGATGGAATCATTAAATGTGCCTCCGG  
CGGGCTGGTGCTGA

*KpMCS*

ACAGGACTCTCTCTTCCAGCAGCGAGCTTCCCGGACTCGGTTCAATTTCTGATCCAGTTTTCAAACCTTTGAAGCGAGTTATGGTGTCTTTCAGGAGCCC  
TCACTGCGCTTTCTCGTCTACGTTCTCGTGTTAGCCAACAATCTGGTCTCTCCAATTTCTGTCAGATGGCTTCAGATGCAAAGCTCTTCTTCTGATCTTG  
ACCTTCATTCTCAGCTCAAGGAGTTGATTCCAGAACAAACAGGAGCGCCTGAAGAAAGTCAAGTCAGAAATATGGGAAGTCCCAGTTGGGAAATATTACT  
GTTGATATGGTAATTGGTGGCATGAGAGGAATGACTGGCCTACTGTGGGAAGGCTCTTTACTTGATCCTGATGAGGGAATTCGATTTAGGGGCTTGT  
CGATTCTGAATGCCAACAAAGTATTACCCAGCTGCAAAGCCTGA
